# Supplementary material for: An innovative GC-MS, NMR and ESR combined, gas-phase investigation during chemical vapor deposition of silicon oxynitrides films from tris(dimethylsilyl)amine
Source: Royal Society of Chemistry journal article supplement (doi:10.1039/d1cp01129d), 2021-01-01
Supplement: d1cp01129d1.pdf [file d1cp01129d1.pdf]

## Supporting Information

### An innovative GC-MS, NMR and ESR combined, gas-phase investigation during chemical vapor deposition of silicon oxynitrides films from tris(dimethylsilyl)amine

*Laura Decosterd, Konstantina C. Topka, Babacar Diallo, Diane Samelor, Hugues Vergnes, François Senocq, Brigitte Caussat, Constantin Vahlas, Marie-Joëlle Menu\**

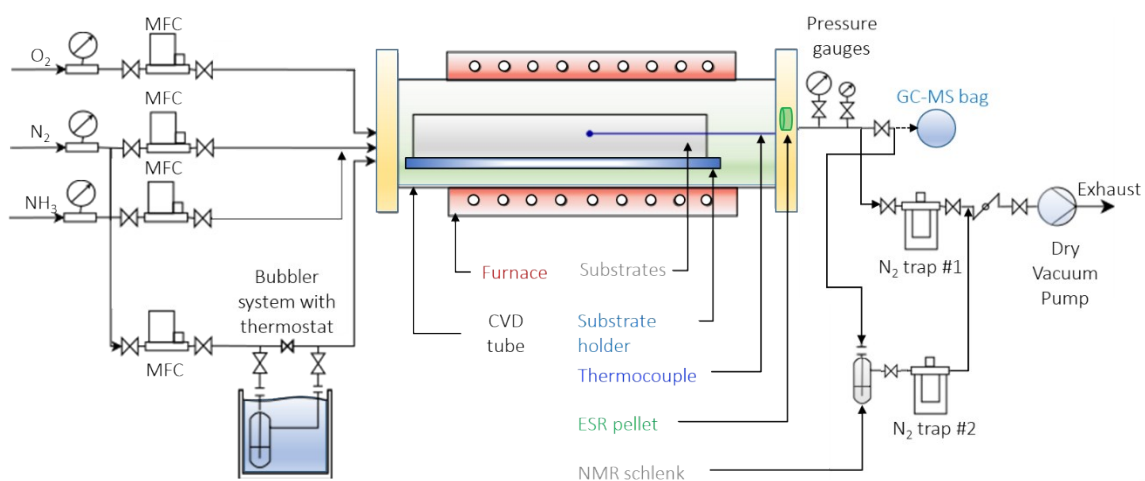

Figure S1. Schematic representation of the tubular CVD reactor

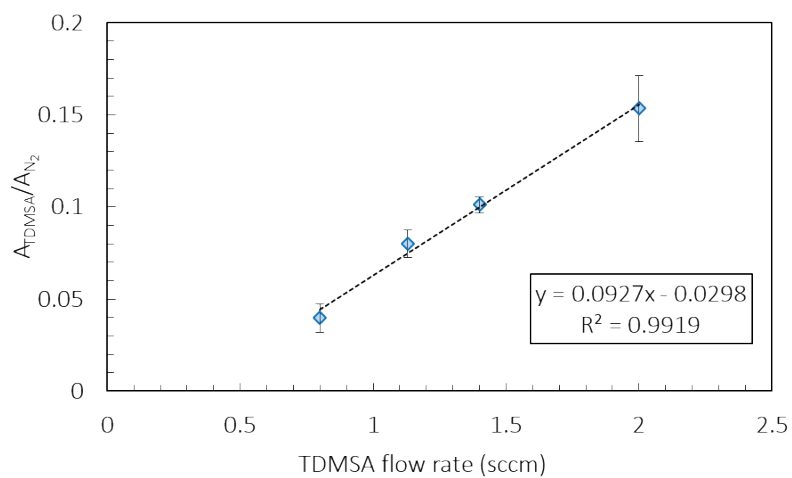

Figure S2. Calibration curve of TDMSA
